# Supplementary material for: Combining MGMT promoter pyrosequencing and protein expression to optimize prognosis stratification in glioblastoma
Source: PubMed Central journal article supplement — Cancer Sci. 2021 Jul 2;112(9):3699–710. doi: 10.1111/cas.15024 (PMC8409410; doi:10.1111/cas.15024), 2021-07-02
Supplement: CAS-112-3699-s001.pdf [file CAS-112-3699-s001.pdf]

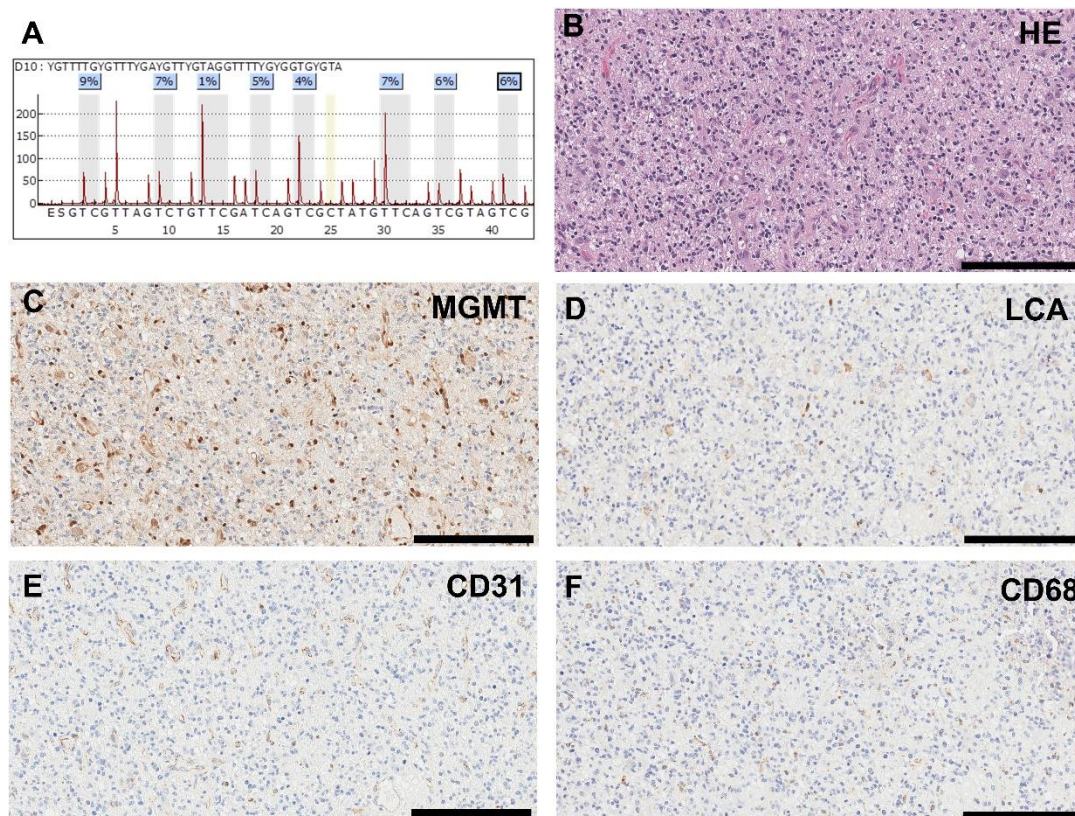

**Supporting Fig S2.** Representative IHC results for a glioblastoma patient. A, PSQ result showed the average methylation level was 6%, and the methylation levels of CpG 74 and CpG 80 were higher than the corresponding cutoff values while the others were lower. Thus, the patients could be classified into the “gray zone”. B, hematoxylin and eosin staining was used to determine the fields for evaluating. C-F, MGMT (C), LCA (D), CD31 (E) and CD68 (F) staining results, respectively. Though 34% cells were positive for MGMT, most of them were lymphocytes (LCA+), endotheliocytes (CD31+) or macrophages (CD68+), and the final IHC score for MGMT were 16%. Therefore, this gray zone patient exhibited low MGMT expression and could be reclassified into “refined methylated” subgroup. After initial treatment, this patient has survived for 53 months without tumor recurrence. (Bars, 200 $\mu$ m)
