# Supplementary figures and images for: Combining MGMT promoter pyrosequencing and protein expression to optimize prognosis stratification in glioblastoma
Source: PubMed Central journal article supplement — Cancer Sci. 2021 Jul 2;112(9):3699–710. doi: 10.1111/cas.15024 (PMC8409410; doi:10.1111/cas.15024), 2021-07-02

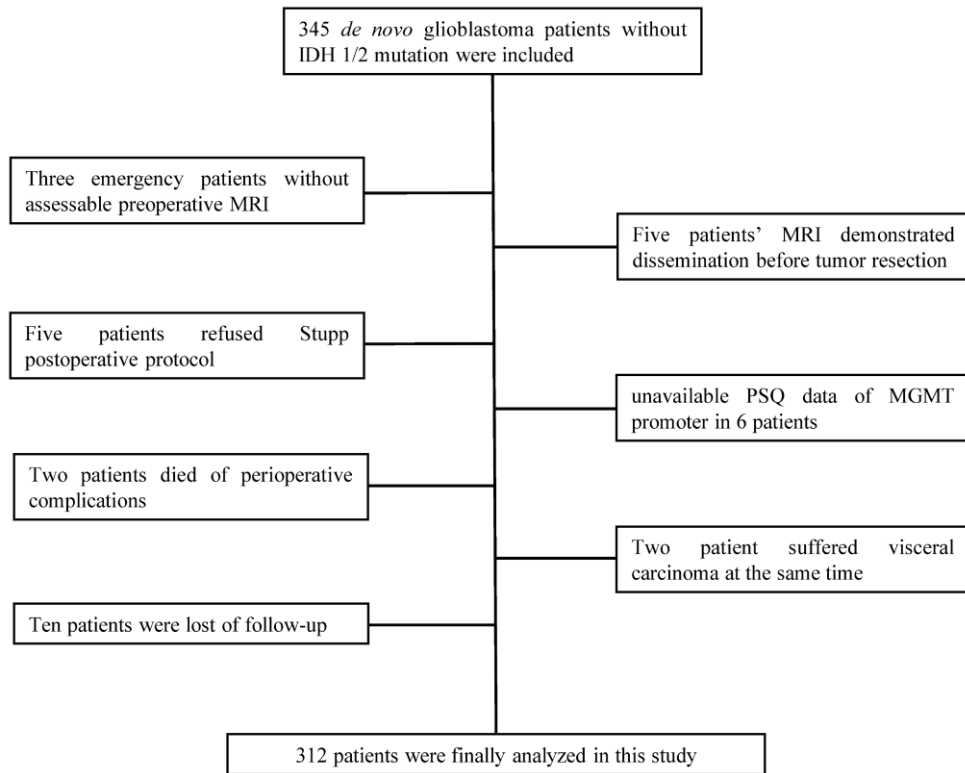

**Supporting FigS1.**

The patients inclusion and exclusion criterion.

Supplement: CAS-112-3699-s002.pdf [file CAS-112-3699-s002.pdf]
